# Supplementary material for: TRAP1 chaperone protein mutations and autoinflammation
Source: Life Sci Alliance. 2019 Dec 27;3(2):e201900376. doi: 10.26508/lsa.201900376 (PMC6975284; doi:10.26508/lsa.201900376)
Supplement: Supplementary file 2 [file LSA-2019-00376_TableS2.xlsx]

## Sheet: Sheet1
	Copy 1		Copy 2		Phenotype
	Variant	Domain	Variant	Domain
Kindred	R128H	Hsp90N (GHKL ATP-binding)	R128H	Hsp90N (GHKL ATP-binding)	Severe autoinflammation
Pat. 4	R128H	Hsp90N (GHKL ATP-binding)	R316H, Y444N	HSP90M (GHKL ATPase)/HSP90M	Intermittent autoinflammation
CAKUT1	R46Sfs*75	Mito-localisation	E442K	HSP90M	VACTERL
CAKUT 2	I253V	HSP90N	L525F	HSP90M	multicystic dysplastic kidney
CAKUT 3	V555I	HSP90M	Y444N	HSP90M	VACTERL
CAKUT 4+5	R469H	HSP90M	R469H	HSP90M	CAKUT/VACTERL
