# Supplementary material for: TRAP1 chaperone protein mutations and autoinflammation
Source: Life Sci Alliance. 2019 Dec 27;3(2):e201900376. doi: 10.26508/lsa.201900376 (PMC6975284; doi:10.26508/lsa.201900376)
Supplement: Supplementary file 3 [file LSA-2019-00376_TableS3.xlsx]

## Sheet: Sheet1
Cytokine	IL6	IL 10	TNF-a	IL1Ra	TNFR1	SAA	Treatment at time of sample
(Normal range)	(0.43-8.9 pg/ml)	(<3.8 pg/ml)	(<15.6 pg/ml)	(48-1168 pg/ml)	(484-1407 pg/ml)	(<9.9mg/L)
						CRP
						(< 20mg/L)
IV-1
22.4.2005	0	0	0	1019	927	CRP 65	Thalidomide 1mg/kg oral daily
						SAA 118
13.5.2005	0	0	0	2714	973	CRP 7 SAA 12	Anankinra 1mg/kg sc daily
29.7.2005	0	0	0	2099	553	CRP 47 SAA 254	Anakinra 2mg/kg sc daily
7.9.2005	0	0	0	2218	581	CRP 41	Anakinra 2mg/kg sc daily
						SAA 86
9.12.2005	0	4	15.5	1218	>5000	CRP 27	Anakinra 2mg/kg sc daily
						SAA 33
18.1.2006	0	0.7	-	-	1699	CRP 33	Anakinra 2mg/kg sc daily
						SAA123
17.3.2006	0	3.5	8.8	-	1038	CRP16	Anakinra 2mg/kg sc daily
						SAA 111
IV-2
7.11.2005	7.6	0	0	1177	505	SAA 17	Azathioprine 2mg/kg daily
						CRP 73
9.12.2005	2.3	5.1	5.2	2898	>5000	CRP 83	Azathioprine 2mg/kg daily
						SAA 701
9.1.2006	0	0.4	3.8	2842	1223	CRP 71	Azathioprine 2mg/kg daily
						SAA 685
3.3.2006	0	1.3	4.8	2144	1596	CRP 28	Azathioprine 2mg/kg
						SAA38	Prednisolone 1mg/kg
9.6.2006	1	0	2.6	5200	2112	CRP 9	Anakinra 1mg/kg
							Prednisolone 1mg/kg daily
